# Supplementary material for: Fabrication and Characterization of Nanostructured Rock Wool as a Novel Material for Efficient Water-Splitting Application
Source: MDPI journal article supplement (doi:10.3390/nano12132169), 2022-06-24
Supplement: s1 [file s1]

# Supplementary Data

## Fabrication and Characterization of Nanostructured Rock Wool as a Novel Material for Efficient Water-Splitting Application

Sahar A. El-Gharbawy <sup>1,2</sup>, Mawaheb Al-Dossari <sup>3</sup>, Mohamed Zayed <sup>4</sup>, Heba A. Saudi <sup>1</sup>, Mohamed Y. Hassaan <sup>1</sup>, Nada Alfryyan <sup>5</sup> and Mohamed Shaban <sup>4,6,\*</sup>

<sup>1</sup> Department of Physics, Faculty of Science, Al-Azhar University (Girls' Branch), Nasr City, Cairo 11884, Egypt; fouads5649@gmail.com (S.A.E.-G.); heba\_saudi@azhar.edu.eg (H.A.S.); myhassaan@yahoo.com (M.Y.H.)

<sup>2</sup> Housing and Building National Research Center, 87 El-Tahrir St., Dokki, Giza 1770, Egypt

<sup>3</sup> Department of Physics, Faculty of Science, King Khalid University, Abha 62529, Saudi Arabia; mdsori@kku.edu.sa

<sup>4</sup> Nanophotonics and Applications (NPA) Lab, Department of Physics, Faculty of Science, Beni-Suef University, Beni-Suef 62514, Egypt; m.zayed88ph@yahoo.com

<sup>5</sup> Department of Physics, College of Sciences, Princess Nourah bint Abdulrahman University, P.O. Box 84428, Riyadh 11671, Saudi Arabia; naalfryyan@pnu.edu.sa

<sup>6</sup> Physics Department, Faculty of Science, Islamic University of Madinah, P.O. Box 170, Al Madinah Al Monawara 42351, Saudi Arabia

\* Correspondence: mssfadel@aucegypt.edu

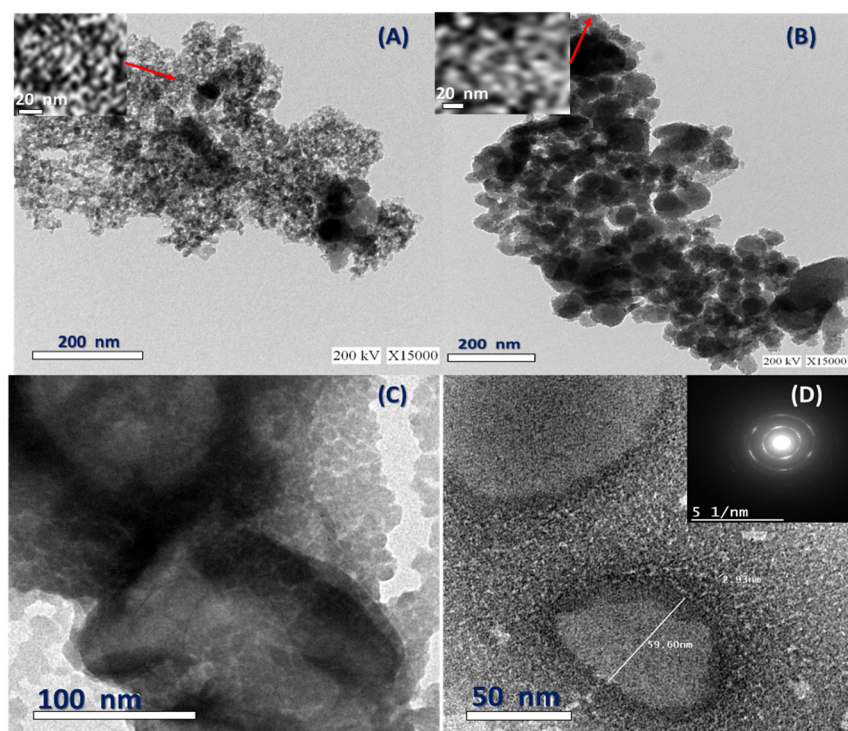

**Figure S1.** HR-TEM of the (A)  $RW_{0.063}$  and (B–D)  $RW_{>0.3}$  after hydrothermal technique at 140 °C and annealing; the inset of (D) shows SAED pattern of  $RW_{>0.3}$ .
